# Supplementary material for: Synthesis, Characterization, and Anti-Cancer Activity of Some New N′-(2-Oxoindolin-3-ylidene)-2-propylpentane hydrazide-hydrazones Derivatives
Source: Molecules. 2015 Aug 13;20(8):14638–55. doi: 10.3390/molecules200814638 (PMC6332339; doi:10.3390/molecules200814638)
Supplement: Supplementary file 1 [file molecules-20-14638-s001.pdf]

# Supplementary Materials

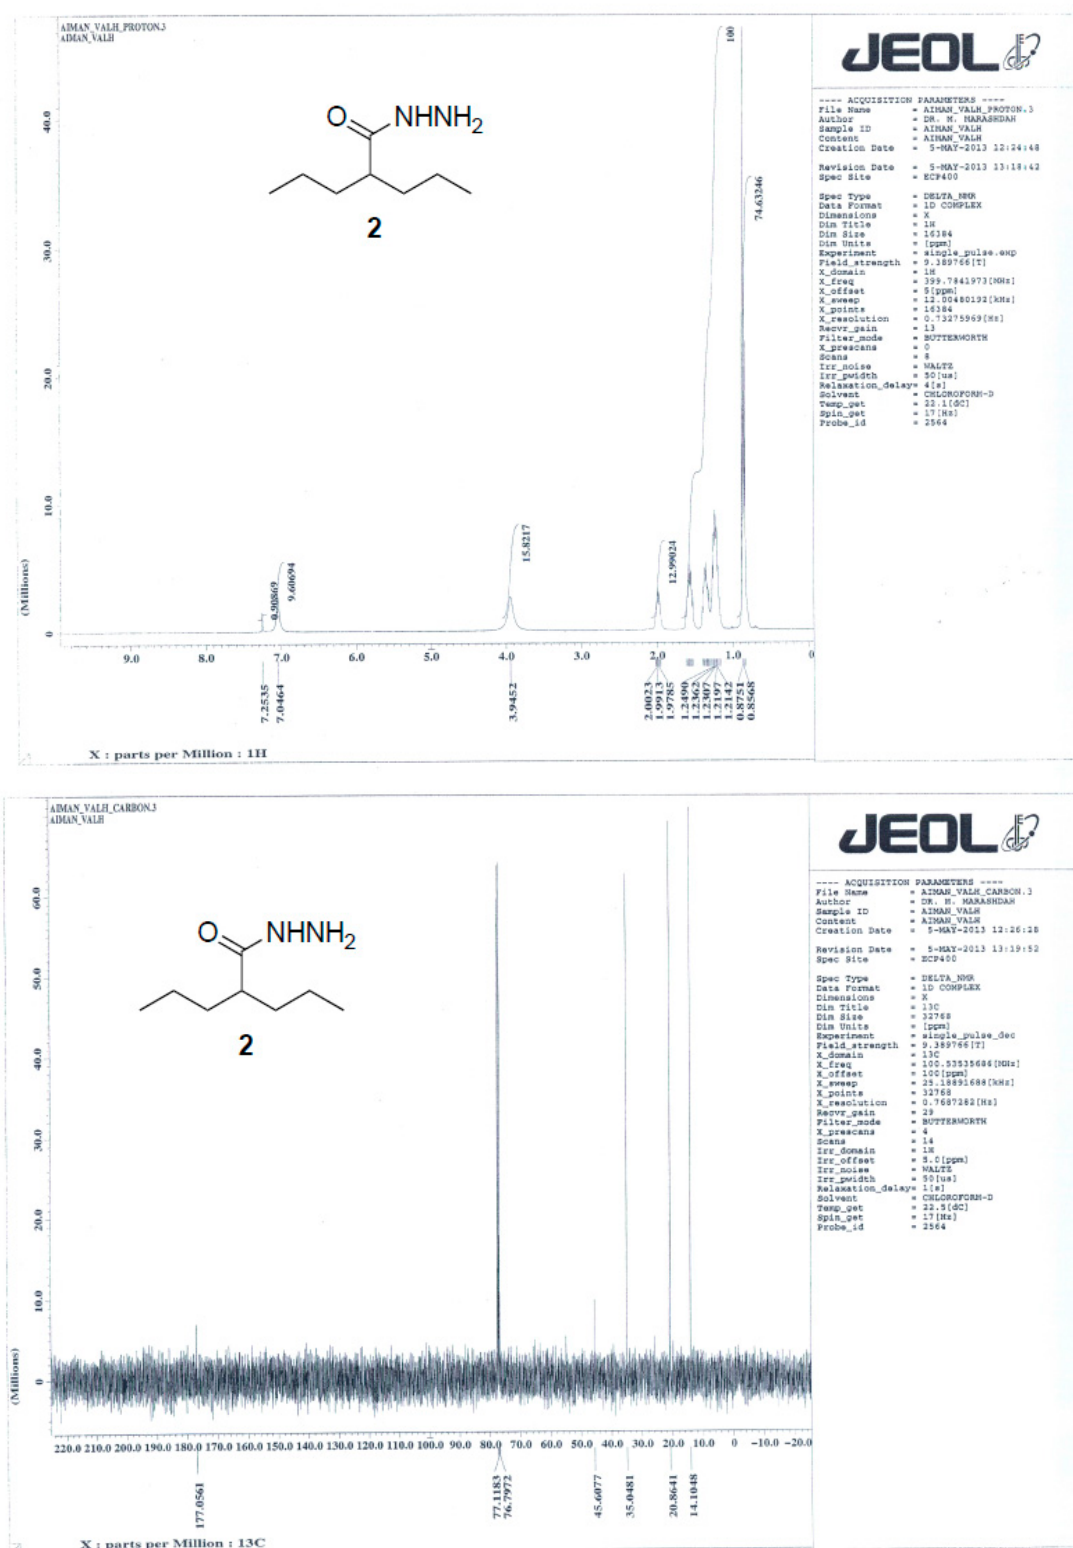

Figure S1. <sup>1</sup>H-NMR and <sup>13</sup>C-NMR of Compound 2.

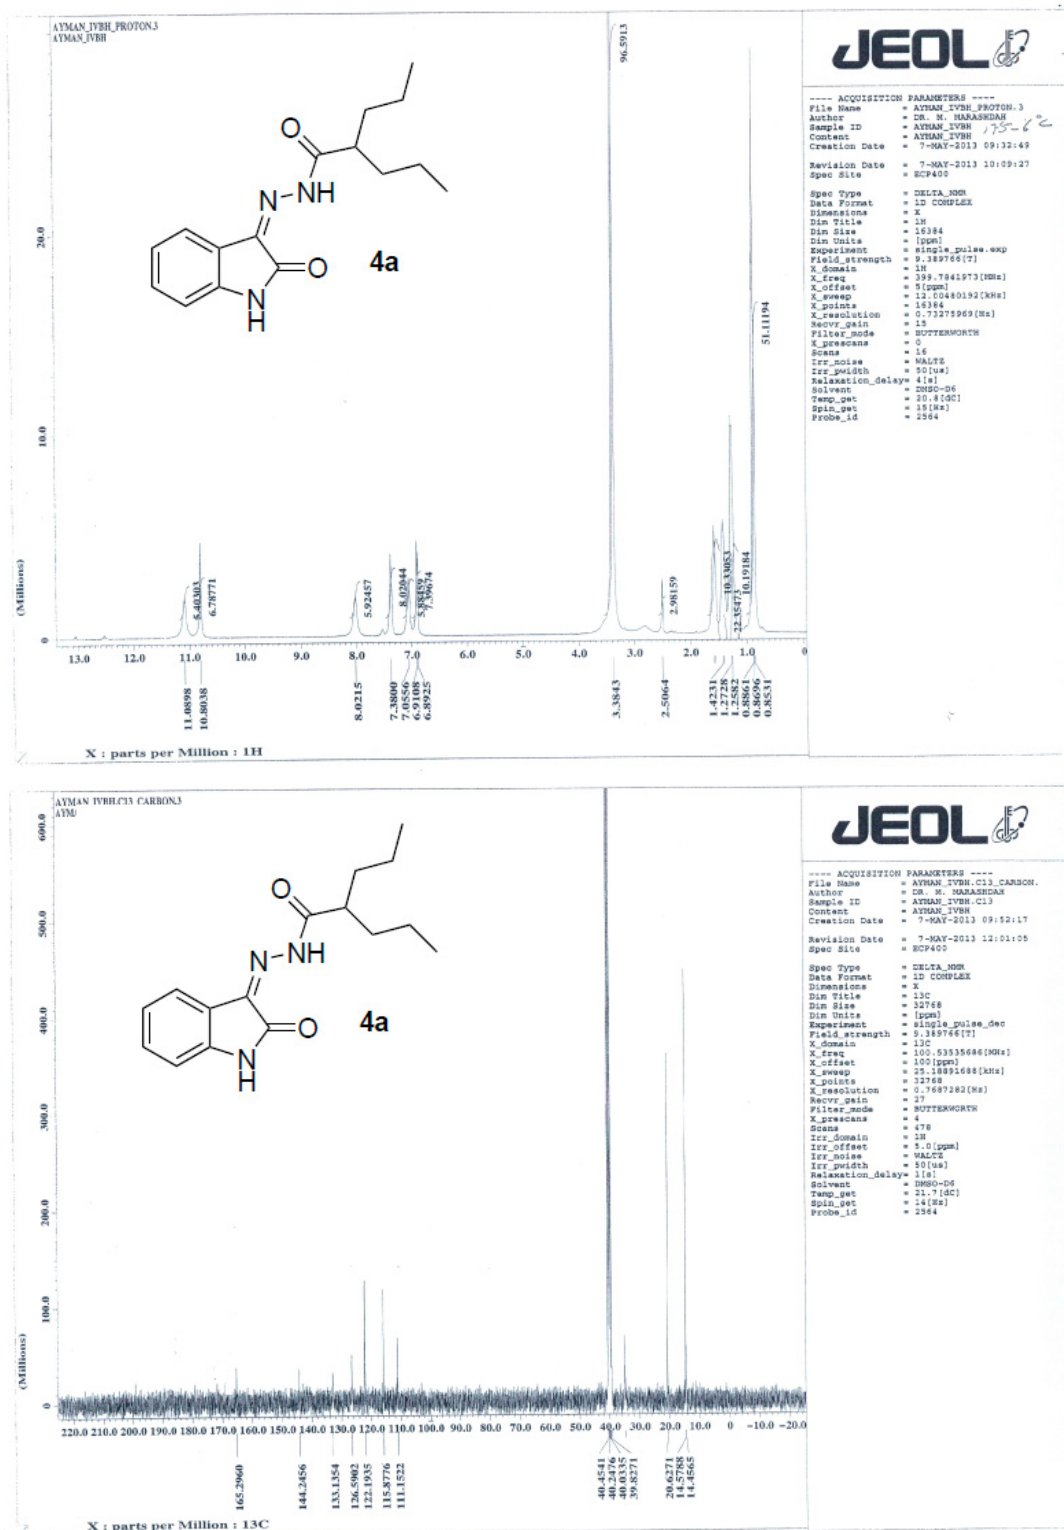

**Figure S2. <sup>1</sup>H-NMR and <sup>13</sup>C-NMR of Compound 4a.**

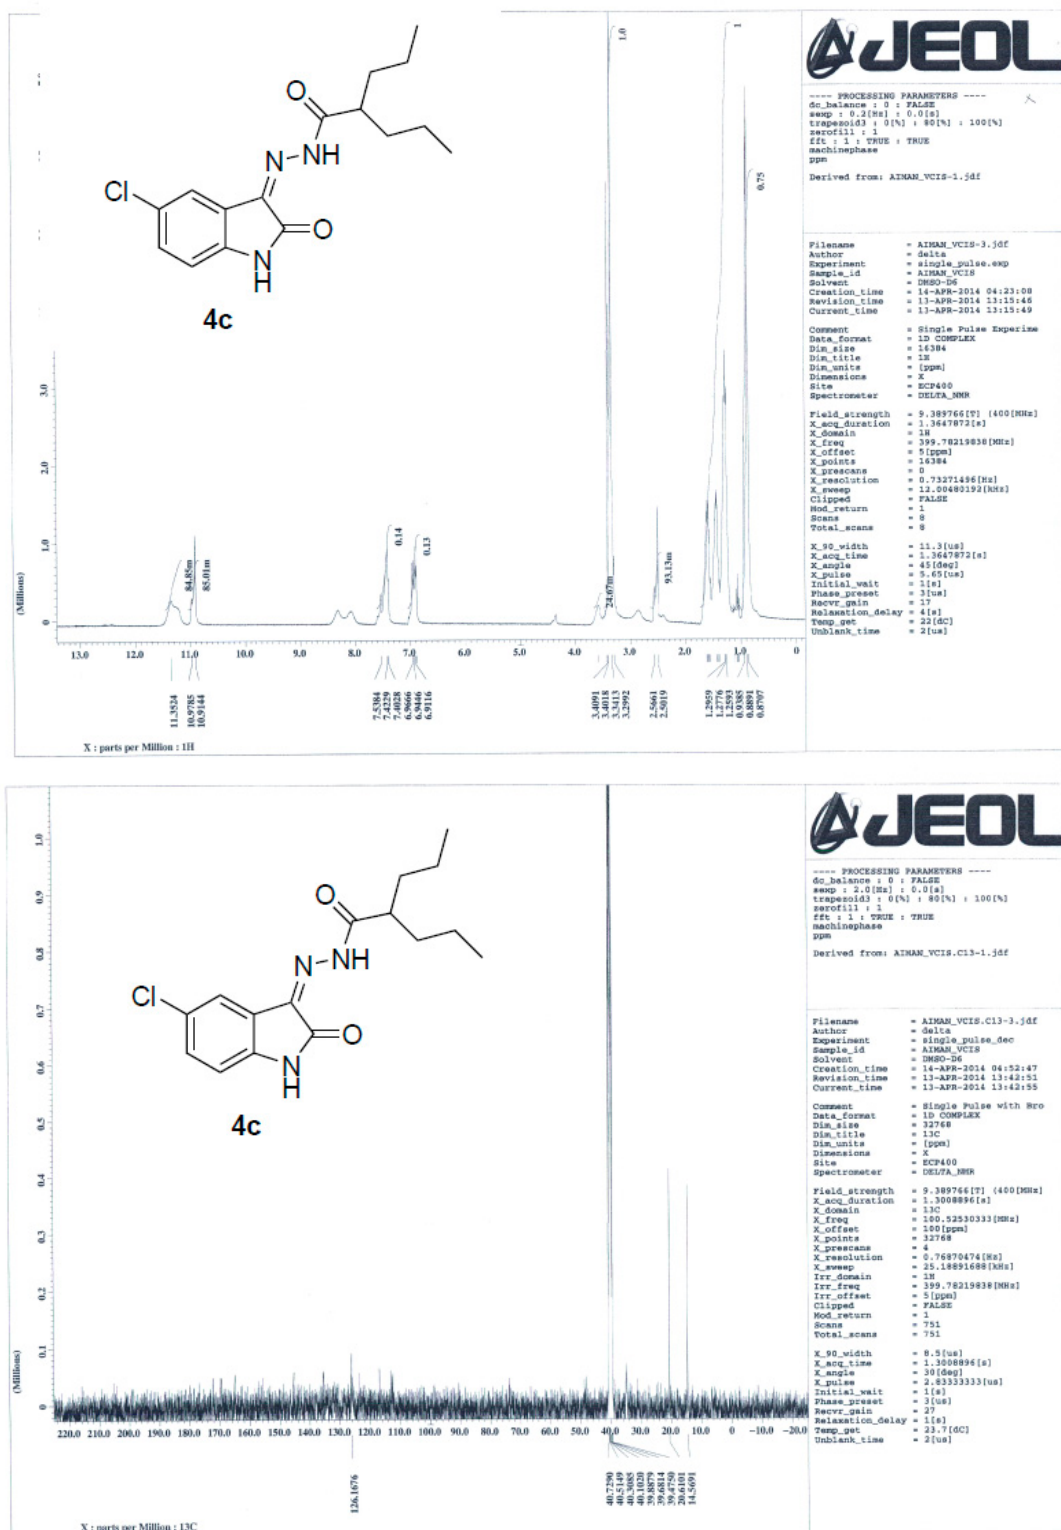

**Figure S3.**  $^1\text{H}$ -NMR and  $^{13}\text{C}$ -NMR of Compound **4c**.

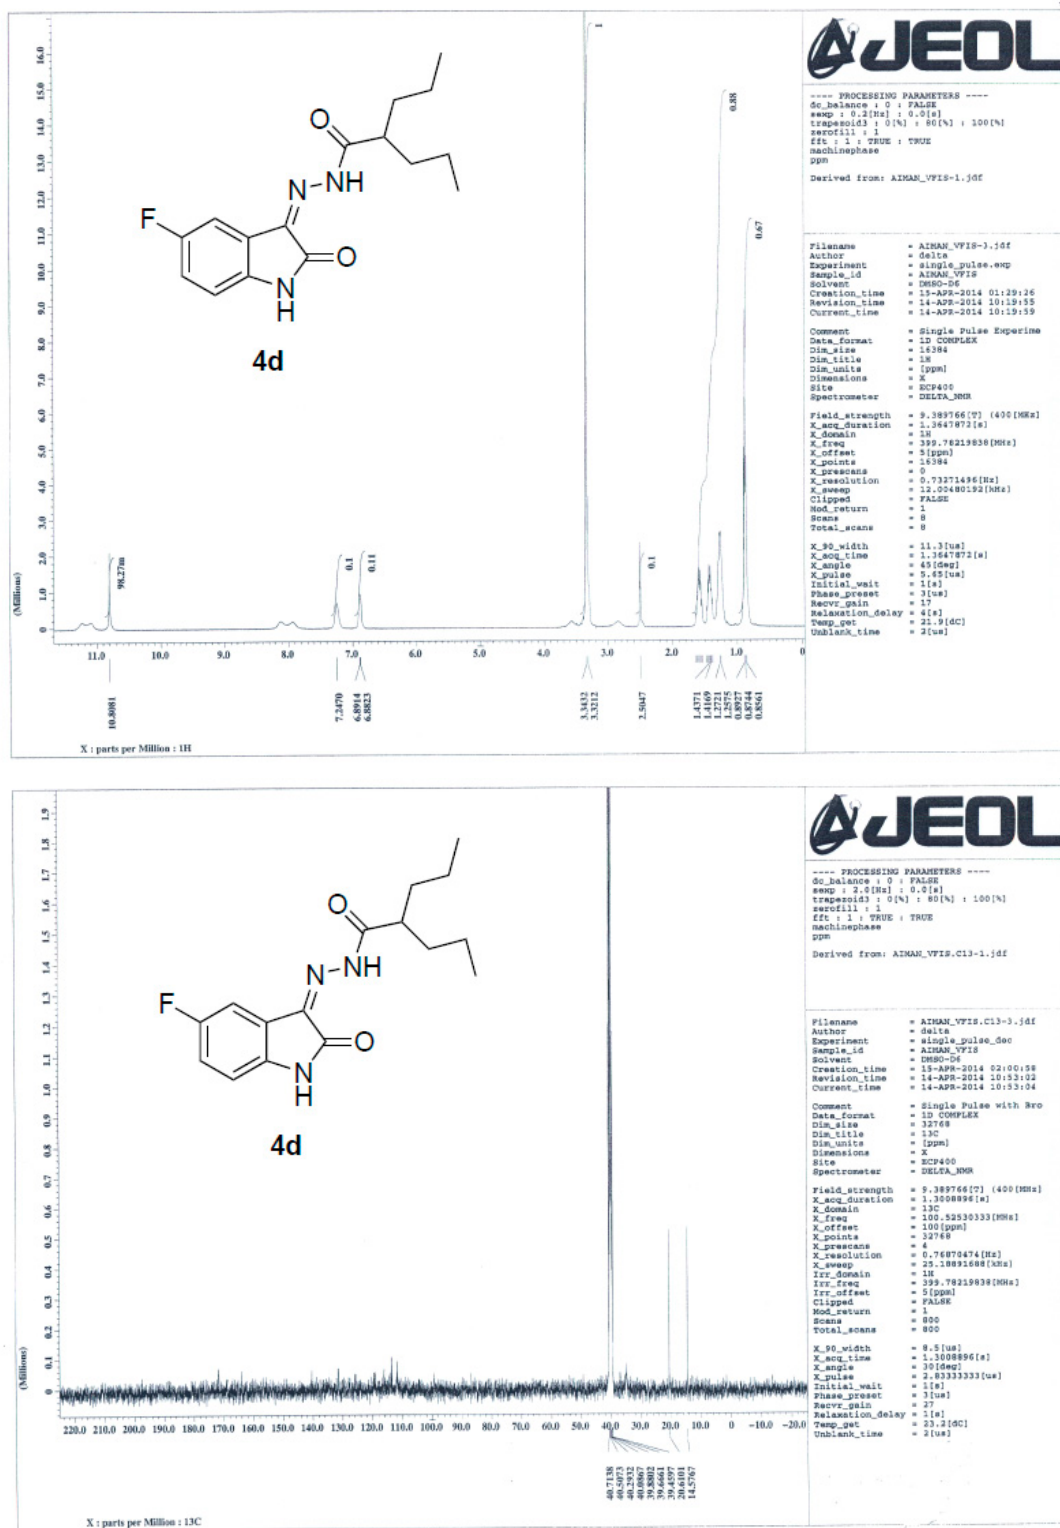

Figure S4. <sup>1</sup>H-NMR and <sup>13</sup>C-NMR of Compound 4d.

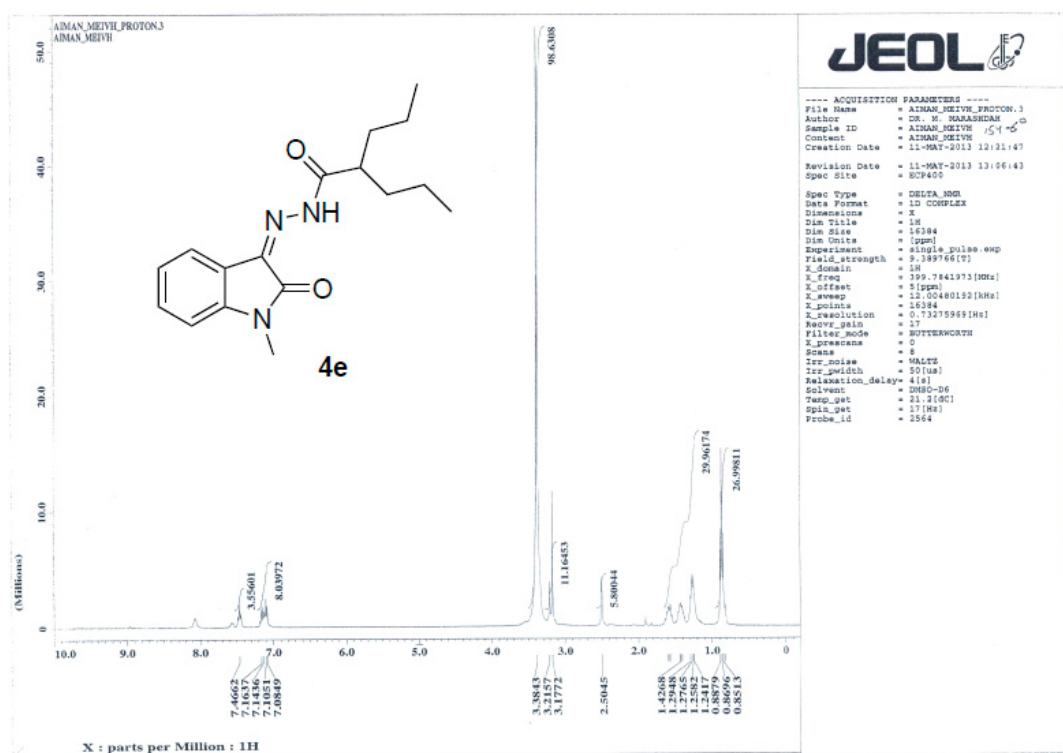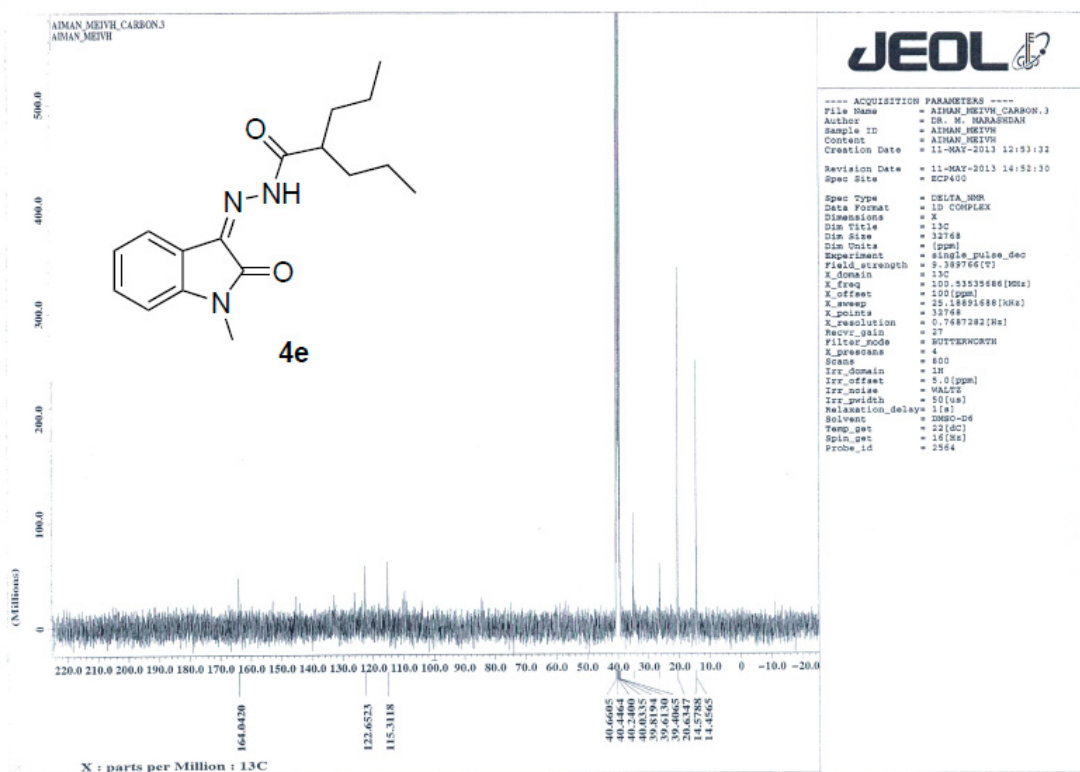

Figure S5.  $^1\text{H}$ -NMR and  $^{13}\text{C}$ -NMR of Compound 4e.

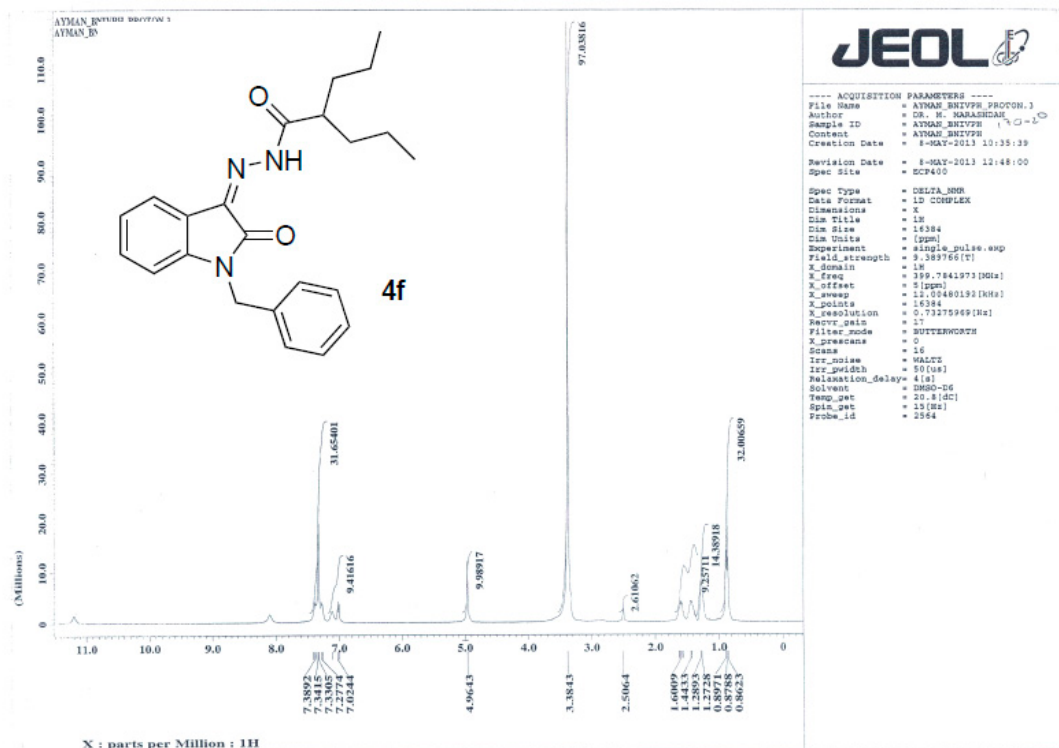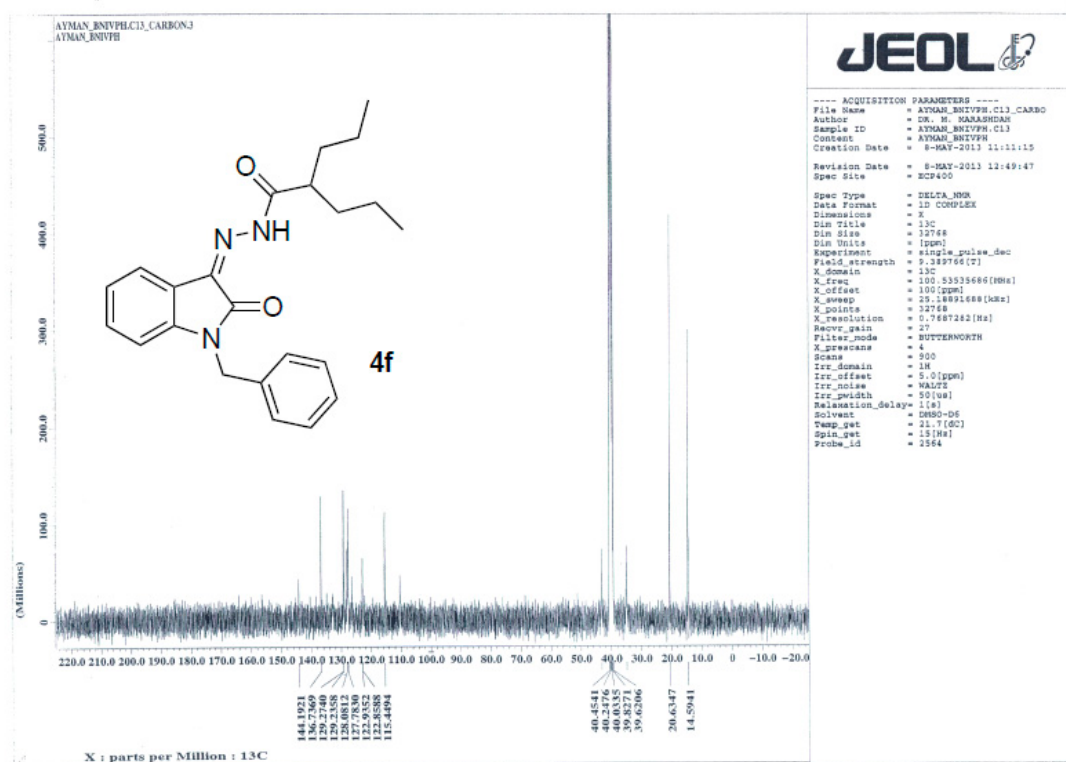

Figure S6.  $^1\text{H}$ -NMR and  $^{13}\text{C}$ -NMR of Compound 4f.

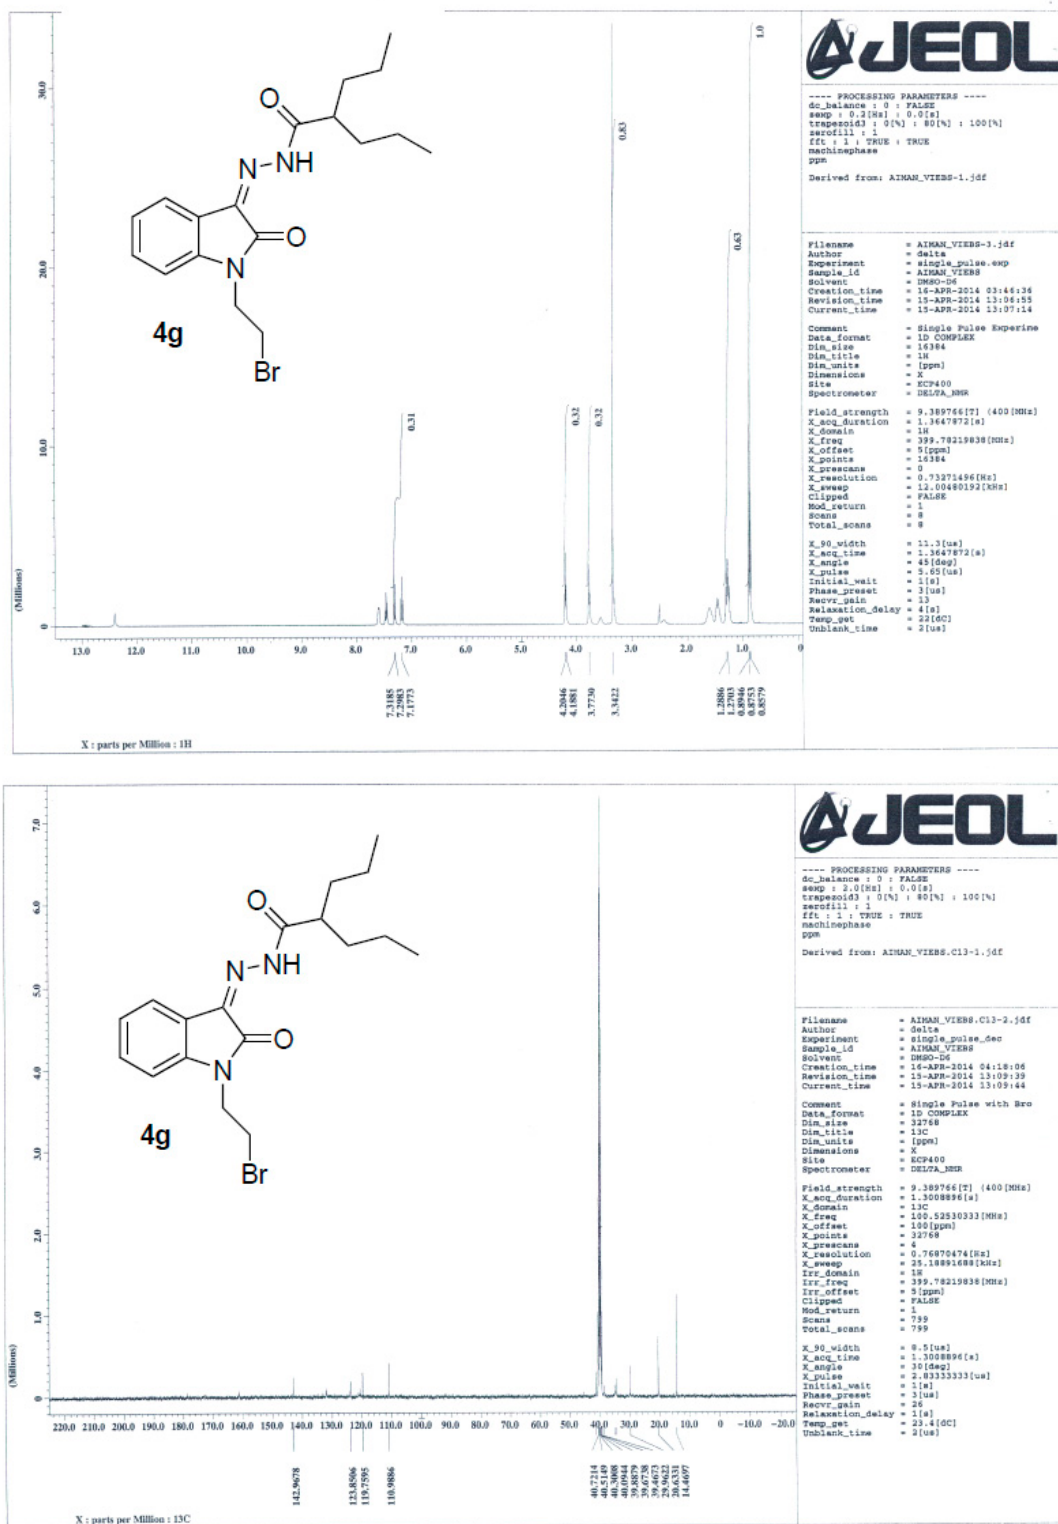

Figure S7. <sup>1</sup>H-NMR and <sup>13</sup>C-NMR of Compound 4g.

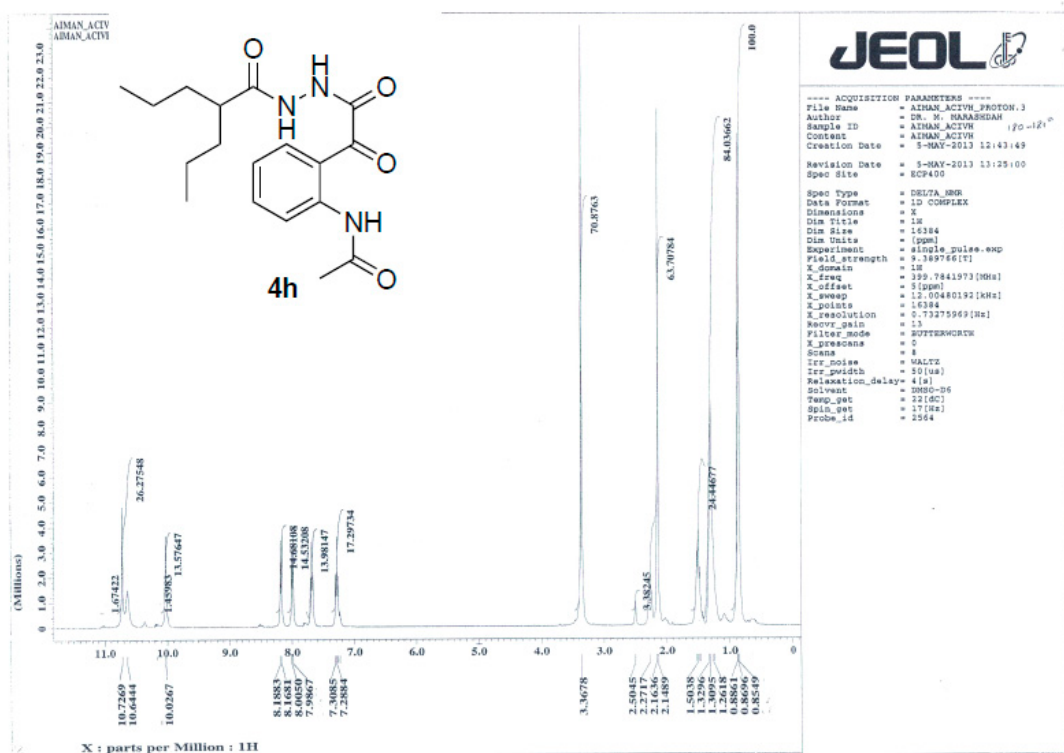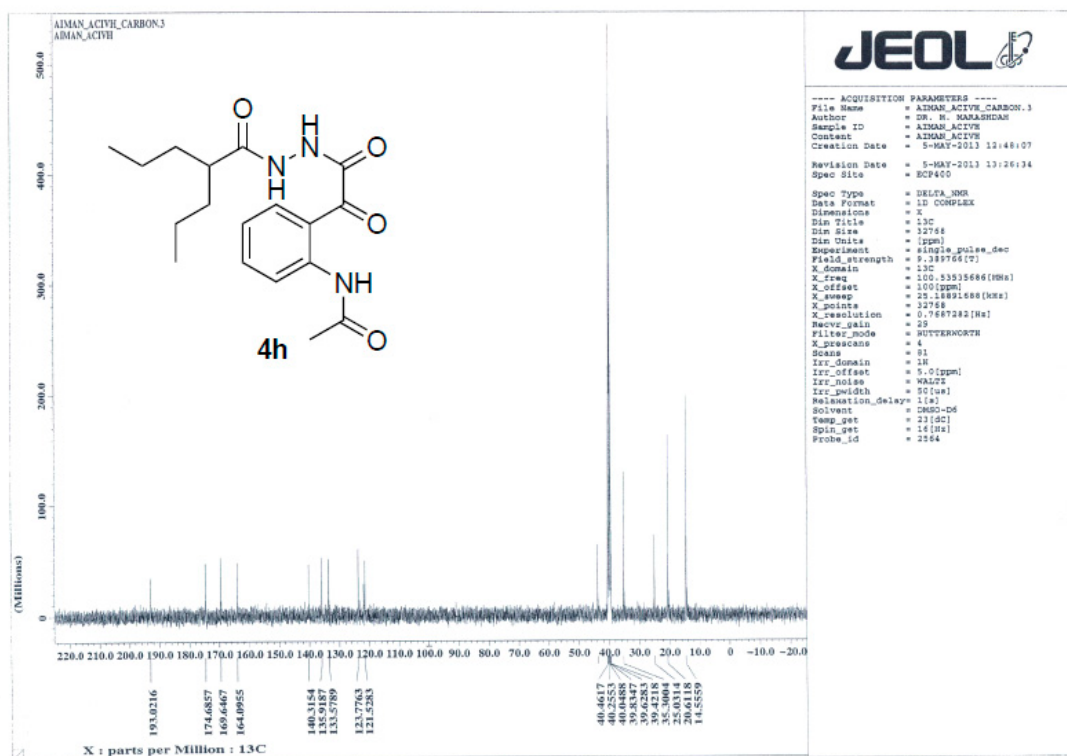

Figure S8.  $^1\text{H}$ -NMR and  $^{13}\text{C}$ -NMR of Compound 4h.
